# Supplementary material for: Reconfigurable Radiation Angle Continuous Deflection of All-Dielectric Phase-Change V-Shaped Antenna
Source: MDPI journal article supplement (doi:10.3390/nano12193305), 2022-09-22
Supplement: s1 [file s1]

# Supplementary Materials: Reconfigurable Radiation Angle Continuous Deflection of All-dielectric Phase-change V-shaped Antenna

Ping Tang <sup>1</sup> , Qiao Tao <sup>1</sup>, Shengde Liu <sup>2</sup>, Jin Xiang <sup>3</sup>, Liyun Zhong <sup>1,\*</sup> and Yuwen Qin <sup>1</sup>

## 1. Electromagnetic Field Mode

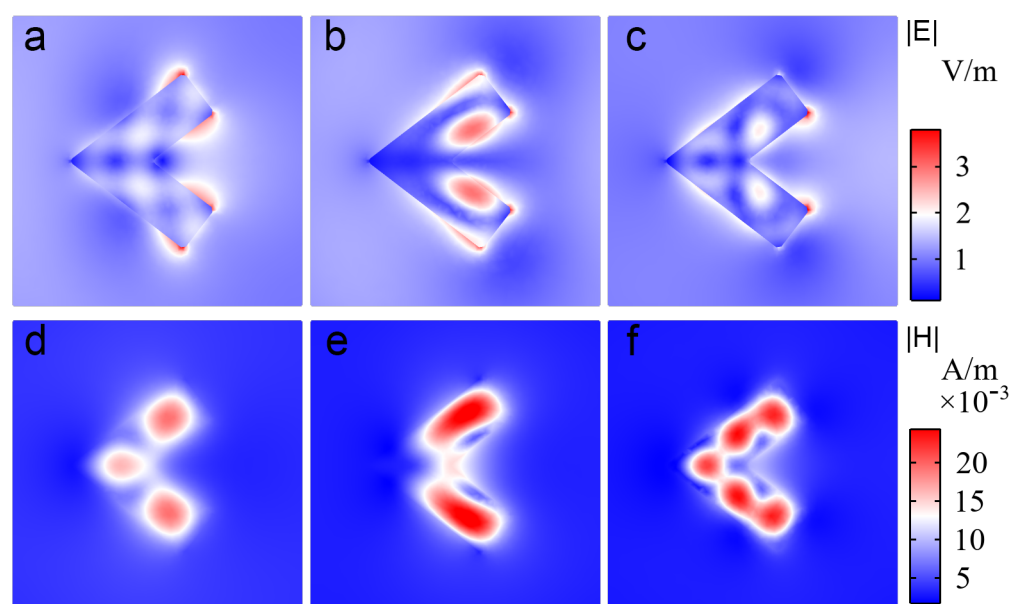

**Figure S1.** (a–c) Electric ( $|E|$ ) and (d–f) magnetic ( $|H|$ ) field distributions in the  $xy$ -plane of the V-shaped phase-change antenna at  $3.6 \mu\text{m}$  wavelength with crystallinity of 20%, 50%, and 80%, respectively.

## 2. Amorphous and Crystalline V-shaped Phase-change Antennas

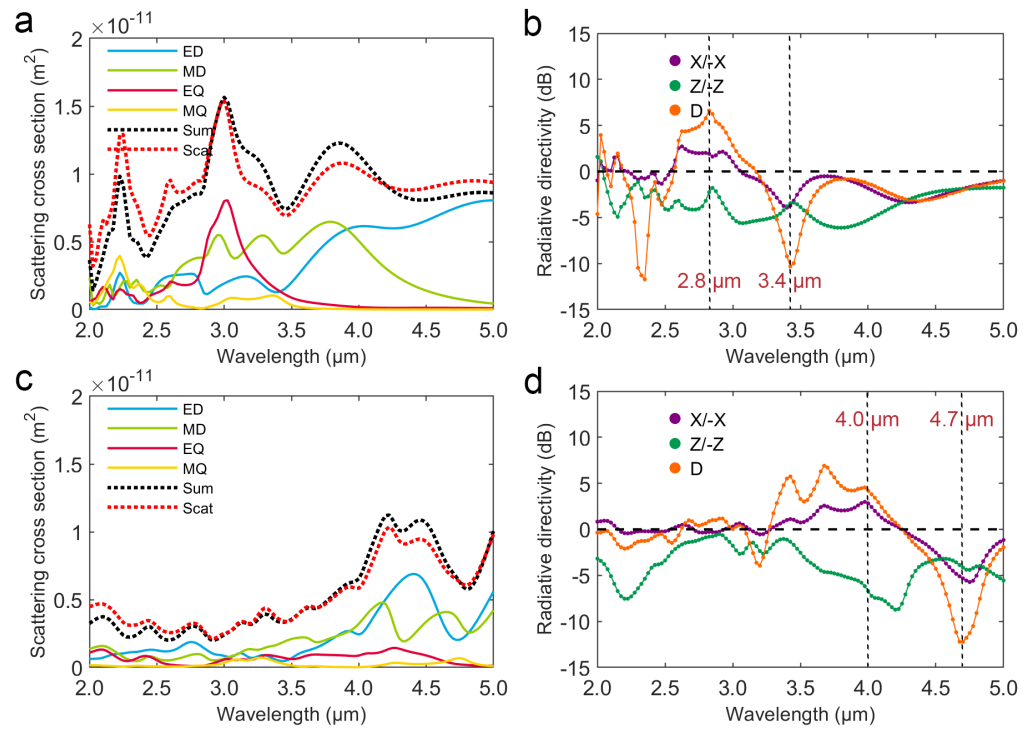

**Figure S2.** Multipole scattering cross sections and directivities of the V-shaped phase-change antenna in 2.0 to 5.0  $\mu\text{m}$  wavelength range: **(a, c)** Scattering cross sections of ED, MD, EQ, MQ, their summation (Sum) and the total scattering cross sections calculated according to scattering filed (Scat) at the crystallinity of 0% and 100%, respectively; **(b, d)** Directivities of  $x$ -axis positive and negative (X/-X),  $z$ -axis positive and negative (Z/-Z), and the specific angle and window (D:  $\theta_0=135^\circ$ ,  $\delta=10^\circ$ ) at the crystallinity of 0% and 100%, respectively.

### 3. Far-field Radiation Patterns of Unit Multipole Scattering Moment

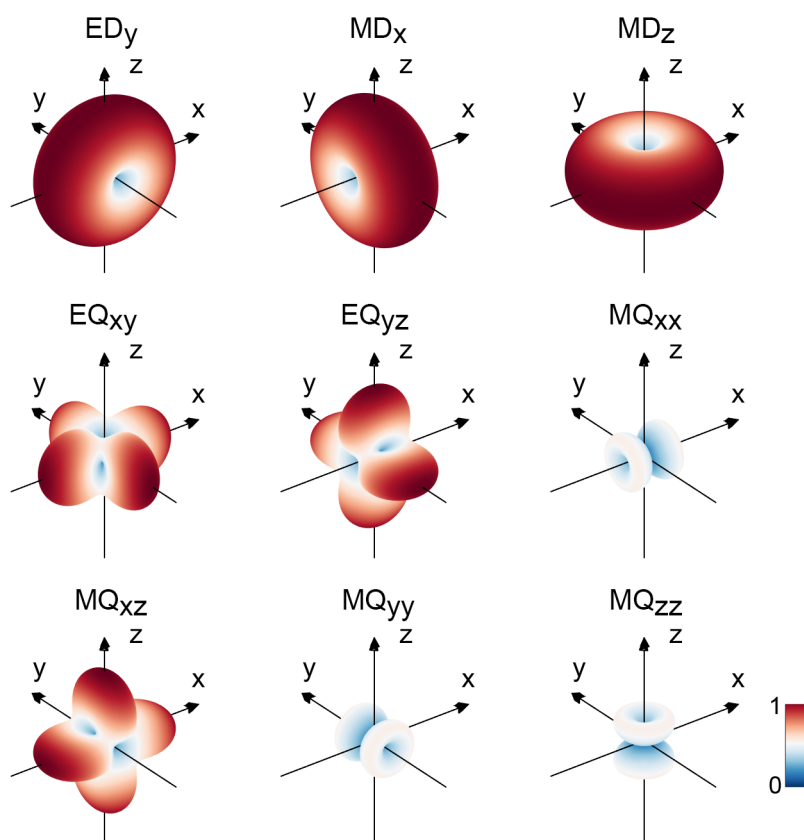

**Figure S3.** Far-field radiation patterns of unit  $ED_y$ ,  $MD_x$ ,  $MD_z$ ,  $EQ_{xy}$ ,  $EQ_{yz}$ ,  $MQ_{xx}$ ,  $MQ_{xz}$ ,  $MQ_{yy}$ , and  $MQ_{zz}$ , respectively.

#### 4. Interference Far-field Radiation of Unit Multipole Moments

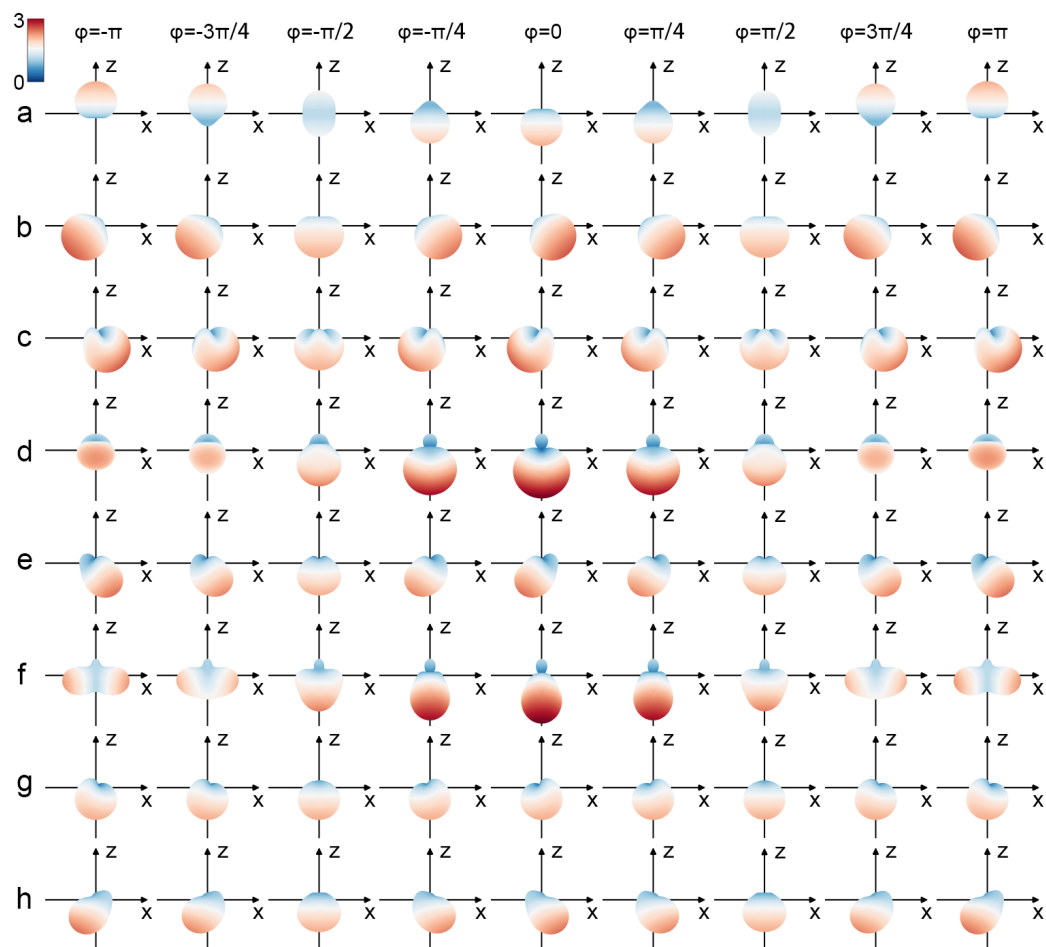

**Figure S4.** Interference far-field radiation patterns of the unit multipole moments with different phase differences: Far-field radiation patterns of (a)  $ED_y + \exp(i\varphi)MD_x$ , (b)  $ED_y + MD_x + \exp(i\varphi)MD_z$ , (c)  $ED_y + MD_x + \exp(i\varphi)EQ_{xy}$ , (d)  $ED_y + MD_x + \exp(i\varphi)EQ_{yz}$ , (e)  $ED_y + MD_x + \exp(i\varphi)MQ_{xx}$ , (f)  $ED_y + MD_x + \exp(i\varphi)MQ_{xz}$ , (g)  $ED_y + MD_x + \exp(i\varphi)MQ_{yy}$ , and (h)  $ED_y + MD_x + \exp(i\varphi)MQ_{zz}$ .

The interference far-field radiation patterns of unit moments with different phase difference are shown in Figure S4. It can be seen that  $MD_x$  with different phase angle mainly affects the backward and forward scattering in the  $z$ -direction (Figure S4a). The calculated interference phase difference between  $MD_x$  and  $ED_y$  (see Figure 5b) varies between  $-\pi/2$  and  $\pi/2$  in crystallinity 0% to 100% range, so its main contribution is forward scattering to the  $-z$  direction. In order to clarify the contribution of other unit multipole moments to the interference far-field, we analyzed the interference far-field radiation of  $ED_y + MD_x + \exp(i\varphi)MD_z$ ,  $ED_y + MD_x + \exp(i\varphi)EQ_{xy}$ ,  $ED_y + MD_x + \exp(i\varphi)EQ_{yz}$ ,  $ED_y + MD_x + \exp(i\varphi)MQ_{xx}$ ,  $ED_y + MD_x + \exp(i\varphi)MQ_{xz}$ ,  $ED_y + MD_x + \exp(i\varphi)MQ_{yy}$ , and  $ED_y + MD_x + \exp(i\varphi)MQ_{zz}$ , and the results are shown in Figure S4b–S4h, respectively. Distinctly, the  $MD_z$ ,  $EQ_{xy}$ ,  $MQ_{xx}$ , and  $MQ_{zz}$  deflect the interference far-field radiation direction; On the contrary, the contributions of  $EQ_{yz}$  and  $MQ_{xz}$  to the interference far-field radiation are symmetric about the  $yz$ -plane; And the intrinsic far-field radiation mode of unit  $MQ_{yy}$  (Figure S3) is none in  $xz$ -plane, so that its influence on D directivity can be ignored. Above results are consistent with the discussion based on Eq. 23 in the main text. Note that: 1)  $MQ_{xx}$  and  $MQ_{zz}$  belong to the third-order mode and the modulus of calculated scattering coefficient  $\alpha_{MQ_{xx}}$  and  $\alpha_{MQ_{zz}}$  are small relative to that of  $\alpha_{MD_z}$  and  $\alpha_{EQ_{xy}}$  (see Figure 4a), so as the contributions of  $MQ_{xx}$  and  $MQ_{zz}$  to the interference far field is relatively little; 2) It can be seen from Figure S4 that the intrinsic far field radiation patterns of unit  $MQ_{xx}$  and

$MQ_{zz}$  are smaller than these of  $MD_z$  and  $EQ_{xy}$ , so  $MQ_{xx}$  and  $MQ_{zz}$  have a relatively minor impact. As a result,  $MD_z$  and  $EQ_{xy}$  make minor contributions to the radiation deflection while  $MD_z$  and  $EQ_{xy}$  are the key moments to the deflection of direction and make the major contributions to the D directivity. The detailed contributions of  $ED_y$ ,  $MD_x$ ,  $MD_z$ , and  $EQ_{xy}$  to the interference far-field radiation are discussed in the main text.

### 5. Directivity of Interference Far-field Radiation with Minor Contributions

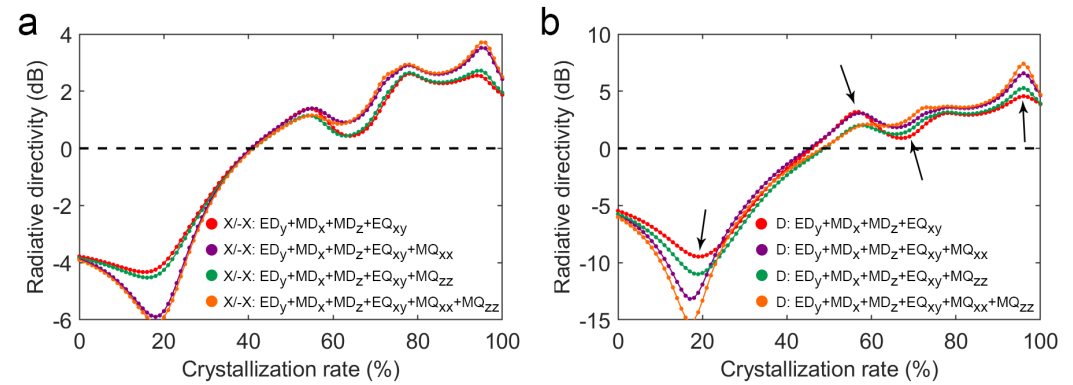

**Figure S5.** Directivities of interference far-field radiation according to the complex coefficients of major ( $ED_y$ ,  $MD_x$ ,  $MD_z$ , and  $EQ_{xy}$ ) and minor ( $MQ_{xx}$  and  $MQ_{zz}$ ) multipole moments at  $3.6 \mu\text{m}$  wavelength: (a) X/-X directivity as a function of crystallinity; (b) D directivity as a function of crystallinity.

### 6. Effect of Geometric Angle on Directivity of V-shaped Phase-change Antenna

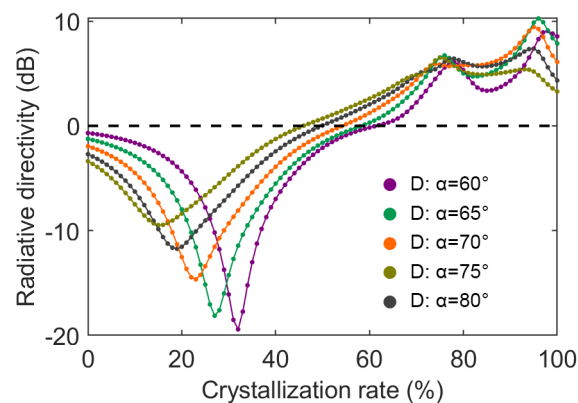

**Figure S6.** D directivities of V-shaped phase-change antenna with different geometric angles ( $\alpha$  in Figure 1a), including  $\alpha=60^\circ$ ,  $\alpha=65^\circ$ ,  $\alpha=70^\circ$ ,  $\alpha=75^\circ$ , and  $\alpha=80^\circ$ .
